# Supplementary material for: Whole Grain Intake and Glycaemic Control in Healthy Subjects: A Systematic Review and Meta-Analysis of Randomized Controlled Trials
Source: Nutrients. 2017 Jul 19;9(7):769. doi: 10.3390/nu9070769 (PMC5537883; doi:10.3390/nu9070769)
Supplement: Supplementary file 1 [file nutrients-09-00769-s001.zip › nutrients-200644-supplementary.pdf]

## Supplementary Material

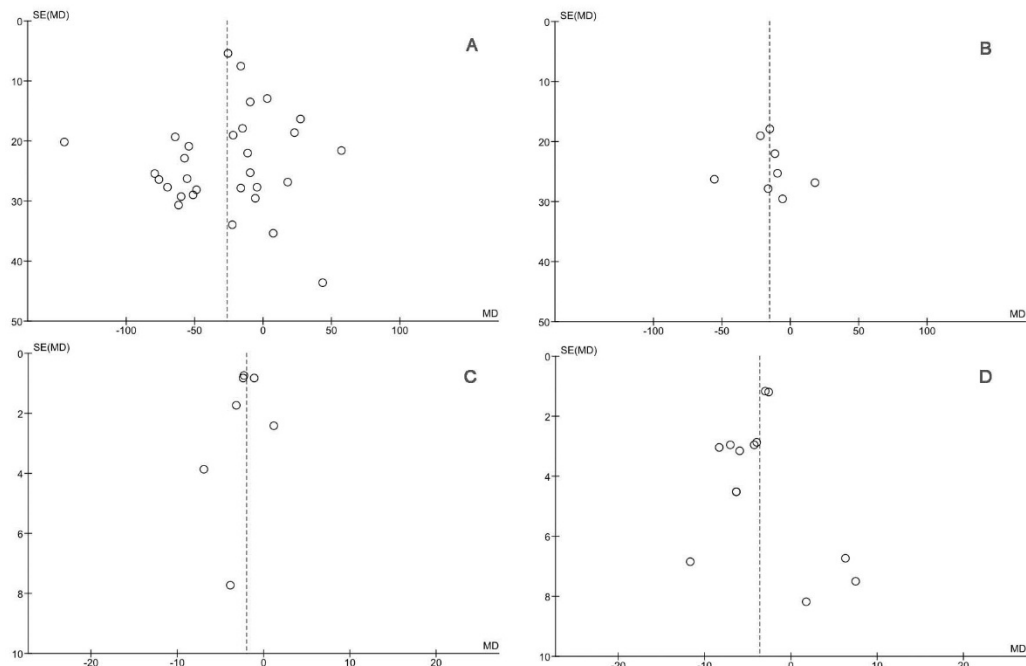

**Supplementary Material Figure S1.** Funnel plots for the effect of whole grain consumption on (A) Glucose iAUC 0–120; (B) Glucose iAUC 0–180; (C) Insulin iAUC 0–120 and (D) Insulin iAUC 0–180

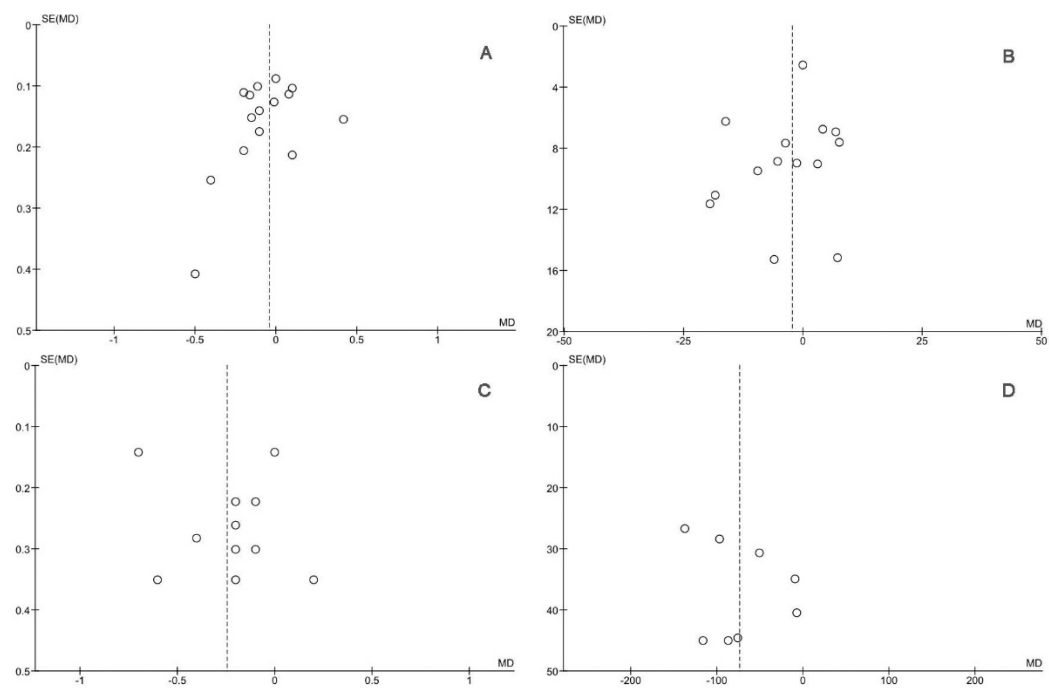

**Supplementary Material Figure S2.** Funnel plots for the effect of whole grain consumption on (A) Fasting glucose; (B) Fasting insulin; (C) Maximal glucose response and (D) maximal insulin response.
